# Supplementary material for: CRISPR Interference Reveals That All-Trans-Retinoic Acid Promotes Macrophage Control of Mycobacterium tuberculosis by Limiting Bacterial Access to Cholesterol and Propionyl Coenzyme A
Source: PubMed Central journal article supplement (PMC8764544; doi:10.1128/mbio.03683-21), 2022-01-18

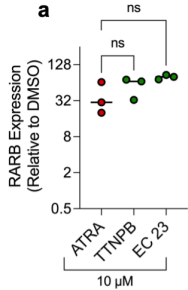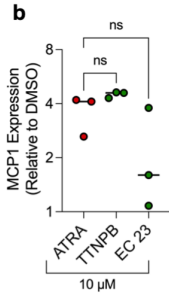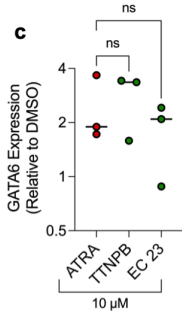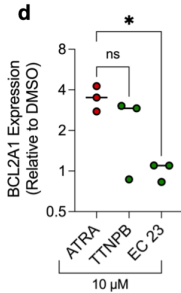

Supplement: mbio.03683-21-sf002.pdf [file mbio.03683-21-sf002.pdf]
